# Supplementary material for: Erosion and rising primary production correlate with shifts in cladoceran community composition across three eastern Canadian lake records
Source: Research Square preprint supplement (doi:10.21203/rs.3.rs-5182010/v1), 2024-11-05
Supplement: Supplementary file 1 [file 83ca9a7c9f98ae7bcdd3c140.docx]

| Geographic variables |  | | Study Lakes | | | |
| --- | --- | --- | --- | --- | --- | --- |
| Lac de Saint-Damase | Lac Michaud | | Green Lake |
| Variables | Units |  | |  |  |
| Latitude |  | 48.653185 | | 48.600798 | 43.839801 |
| Longitude |  | -67.809428 | | -67.821122 | -80.008756 |
| Province |  | Quebec | | Quebec | Ontario |
| Ecozone |  | Atlantic Highlands | | Atlantic Highlands | Mixedwood Plains |
| Area | km2 | 0.66 | | 0.41 | 0.14 |
| Human Impact Score |  | 0.21 | | 0.42 | 0.74 |
| Altitude |  | 187 | | 211 | 396 |
| Shoreline Length |  | 5262.7 | | 2872.2 | 3014.6 |
| Watershed Area | km2 | 16.2 | | 2.2 | 0.9 |
| Fraction Agriculture |  | 0.14 | | 0.12 | 0.30 |
| Fraction Forestry |  | 0.01 | | 0.00 | 0.00 |
| Fraction Mines |  | 0.00 | | 0.00 | 0.23 |
| Fraction Natural Landscapes |  | 0.70 | | 0.29 | 0.19 |
| Fraction Pasture |  | 0.11 | | 0.36 | 0.07 |
| Fraction Urban |  | 0.01 | | 0.04 | 0.08 |
| Fraction Water |  | 0.04 | | 0.19 | 0.14 |
| Limnological variables | Max Depth | m | 3.4 | | 5.7 | 13 |
| Stratification |  | mixed | | mixed | Stratified |
| Secchi | m | 0.6 | | 1.6 | 4.2 |
| *Chlorophyll a* | µg/L | 22.5 | | 7.1 | 4.1 |
| TP Tube | µg/L | 57.9 | | 20.7 | 20.4 |
| TN Tube | mg/L | 0.4 | | 0.2 | 0.2 |
| pH |  | 7.3 | | 7.3 | 8.7 |
| Colour | mg/L Pt | 17.6 | | 6.8 | 6.8 |
| DOC | mg/L | 7.1 | | 17.8 | 5.1 |
| DIC | mg/L | 10.7 | | 15.9 | 28.4 |
| DO Concentration Bottom | mg/L | 8.7 | | 8.6 | 0.7 |
| RBR Specific Conductance Tube | µS/cm at 25 °C | 103.8 | | 163.8 | 478.4 |
| Chloride | mg/L | 3.2 | | 10.7 | 78.3 |
| Sulfate | mg/L | 3.3 | | 4.0 | 11.6 |
| Calcium | mg/L | 13.6 | | 19.9 | 29.9 |
| Potassium | mg/L | 0.5 | | 1.5 | 1.0 |
| Magnesium | mg/L | 1.8 | | 2.6 | 14.7 |
| Sodium | mg/L | 4.9 | | 8.8 | 42.8 |
| Lake Pulse Sampling Date | Month/Day/Year | 8/7/2017 | | 8/1/2017 | 8/8/2017 |
| Lake Pulse Sampling Lake ID |  | 17-059 | | 17-060 | 08-192 |

Table **S1**: Lake Pulse Geographic and Limnological data. Excerpt from Sánchez Schacht et al. (2023).

Table **S2**: Generalized linear model applied to cladoceran taxa in Lac de Saint-Damase to determine the statistically significant taxa across zones.

|  | Deviance | *p*-value |
| --- | --- | --- |
| Multivariate test | 171.08 | 0.001 *** |
| Univariate tests |  |  |
| *B. longirostris* | 7.314 | 0.048* |
| *B. longispina* | 0.001 | 1.000 |
| *Eurycercus* sp. | 0.048 | 1.000 |
| *Acroperus harpae* | 0.143 | 1.000 |
| *Camptocercus* sp. | 0.826 | 0.988 |
| *Alona affinis* | 3.917 | 0.327 |
| *Alona quadrangularis* | 0.281 | 0.999 |
| *Alona costata* | 4.068 | 0.226 |
| *Alona rustica* | 0.927 | 0.985 |
| *Alona guttata* | 0.083 | 1.000 |
| *Alona rectangula* | 7.545 | 0.048* |
| *Graptolebris testudinaria* | 0.43 | 0.994 |
| *Alonella excisa* | 4.228 | 0.193 |
| *Alonella nana* | 21.799 | 0.001** |
| *Disparalona rostrata* | 0.004 | 1.000 |
| *Pleuroxus uncinatus* | 0.576 | 0.994 |
| *C. brevilabris* | 15.753 | 0.001** |
| *C. faviformis* | 0.134 | 1.000 |
| *Paralona pigra* | 2.964 | 0.677 |
| *Sida crystallina* | 0.042 | 1.000 |

Table **S3**: Generalized linear model applied to cladoceran taxa in Lac Michaud to determine the statistically significant taxa across zones.

|  | Deviance | *p*-value |
| --- | --- | --- |
| Multivariate test | 178.82 | 0.001 *** |
| Univariate tests |  |  |
| *B. longirostris* | 4.388 | 0.225 |
| *B. longispina* | 2.572 | 0.534 |
| *Acroperus harpae* | 4.662 | 0.221 |
| *Camptocercus* sp. | 2.98 | 0.508 |
| *Kurzia lattissima* | 0.262 | 0.954 |
| *Alona affinis* | 3.523 | 0.485 |
| *Alona quadrangularis* | 23.315 | 0.001** |
| *Alona rustica* | 1.116 | 0.868 |
| *Alona guttata* | 0.494 | 0.954 |
| *Alona rectangula* | 0.554 | 0.954 |
| *Leydigia* spp. | 0.07 | 0.977 |
| *Rynchotalona falcata* | 0.013 | 0.977 |
| *Alonella excisa* | 1.422 | 0.856 |
| *Alonella nana* | 0.016 | 0.977 |
| *C. brevilabris* | 26.775 | 0.001** |
| *C. faviformis* | 3.12 | 0.508 |
| *Paralona pigra* | 2.964 | 0.677 |
| *Sida crystallina* | 0.042 | 1.000 |

Table **S4**: Generalized linear model applied to cladoceran taxa in Green Lake to determine the statistically significant taxa across zones.

|  | Deviance | *p*-value |
| --- | --- | --- |
| Multivariate test | 1 143.6 | 0.001 *** |
| Univariate tests |  |  |
| *B. longirostris* | 29.18 | 0.001** |
| *B. longispina* | 19.589 | 0.001** |
| *D. longispina* | 17.923 | 0.001** |
| *Eurycercus* sp. | 9.244 | 0.025* |
| *Acroperus harpae* | 4.341 | 0.326 |
| *Camptocercus* sp. | 4.7 | 0.317 |
| *Alona affinis* | 0.002 | 0.952 |
| *Alona quadrangularis* | 0.714 | 0.790 |
| *Alona costata* | 2.128 | 0.610 |
| *Alona guttata* | 0.972 | 0.748 |
| *Alona rectangula* | 0.501 | 0.790 |
| *Graptolebris testudinaria* | 2.122 | 0.610 |
| *Alonella excisa* | 8.406 | 0.034* |
| *Alonella nana* | 15.146 | 0.001** |
| *Pleuroxis straminius* | 3.791 | 0.338 |
| *C. brevilabris* | 17.475 | 0.001** |
| *C. bicornatus* | 7.404 | 0.058 |
